# Supplementary material for: Role of honey in preventing radiation-induced oral mucositis: a meta-analysis of randomized controlled trials
Source: Royal Society of Chemistry journal article supplement (doi:10.1039/d0fo02808h), 2021-01-01
Supplement: d0fo02808h2.pdf [file d0fo02808h2.pdf]

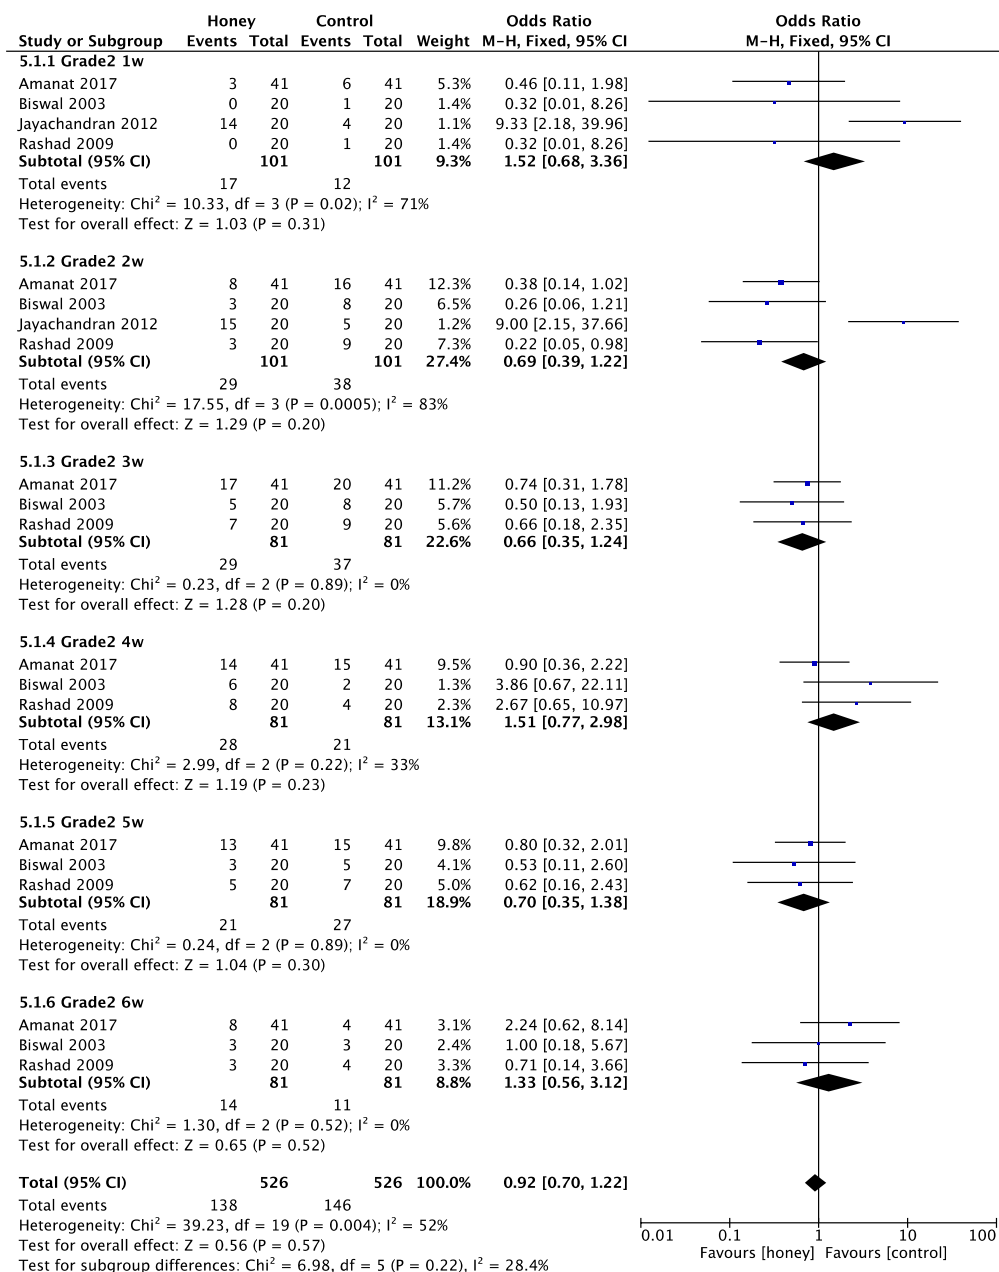

Supplemental figure 1. Forest plot of the incidence of radiotherapy-induced mucositis (Grade 2) (honey vs. control intervention)

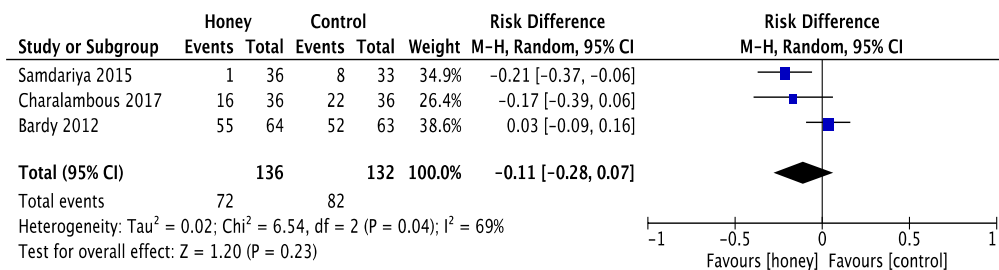

Supplemental figure 2. Forest plot of the incidence of severe pain after radiotherapy (honey vs. control intervention)

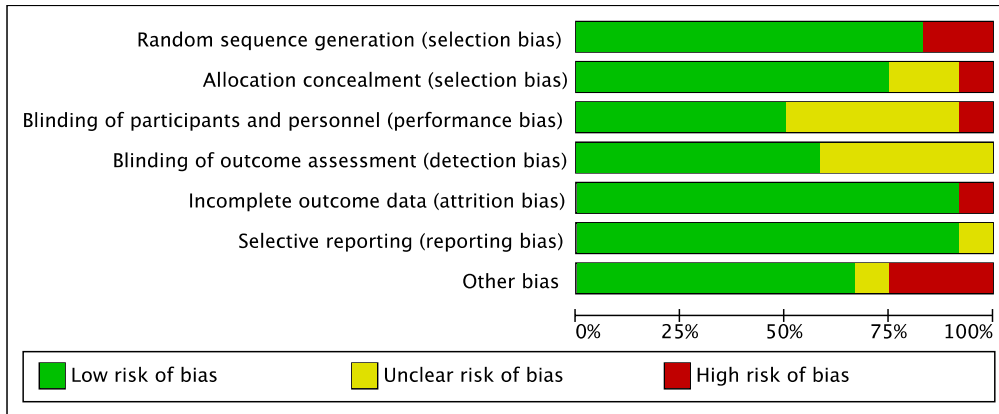

Supplemental figure 3. Percentage risk of bias in the included studies

| Study              | Random sequence generation (selection bias) | Allocation concealment (selection bias) | Blinding of participants and personnel (performance bias) | Blinding of outcome assessment (detection bias) | Incomplete outcome data (attrition bias) | Selective reporting (reporting bias) | Other bias |
|--------------------|---------------------------------------------|-----------------------------------------|-----------------------------------------------------------|-------------------------------------------------|------------------------------------------|--------------------------------------|------------|
| Amanat 2017        | +                                           | +                                       | ?                                                         | ?                                               | +                                        | +                                    | +          |
| Bardy 2012         | +                                           | +                                       | +                                                         | +                                               | +                                        | ?                                    | +          |
| Biswal 2003        | +                                           | +                                       | ?                                                         | ?                                               | +                                        | +                                    | +          |
| Charalambous 2017  | +                                           | +                                       | +                                                         | +                                               | +                                        | +                                    | +          |
| Charalambous 2018  | +                                           | +                                       | +                                                         | +                                               | +                                        | +                                    | +          |
| Hawley 2013        | +                                           | +                                       | +                                                         | +                                               | +                                        | +                                    | +          |
| Jayachandran 2012  | +                                           | -                                       | ?                                                         | ?                                               | +                                        | +                                    | +          |
| Khanal 2010        | +                                           | +                                       | ?                                                         | ?                                               | +                                        | +                                    | +          |
| Morallebnejad 2008 | +                                           | ?                                       | -                                                         | +                                               | +                                        | +                                    | +          |
| Rao 2017           | +                                           | +                                       | +                                                         | +                                               | +                                        | +                                    | +          |
| Rashad 2009        | -                                           | ?                                       | ?                                                         | ?                                               | +                                        | +                                    | ?          |
| Samdarivya 2015    | +                                           | +                                       | +                                                         | +                                               | -                                        | +                                    | -          |

Supplemental figure 4. Types of potential bias in the included studies

Grade 1

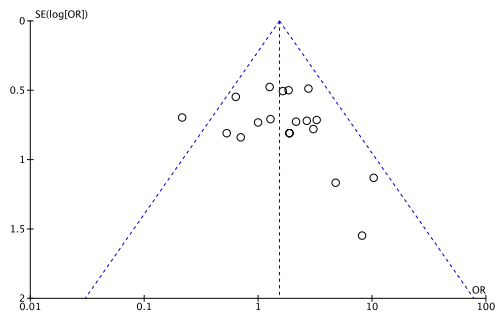

Grade 2

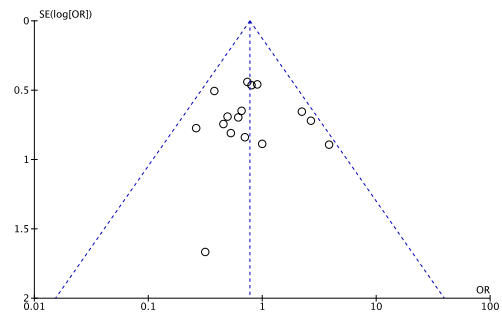

Grade 3

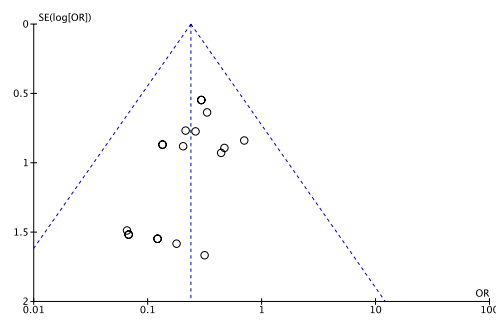

Grade 4

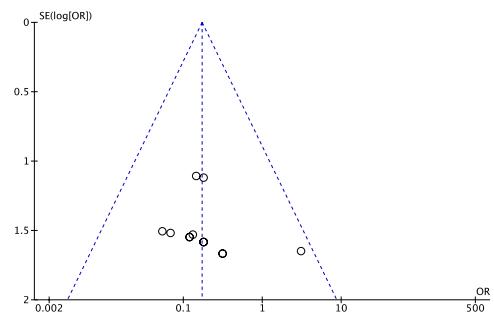

Supplemental figure 5. Analysis of publish bias by funnel plot in different grade of mucositis.

Supplement table 1.

**Characteristics of patients and trials associated with honey treatment arm vs control arm**

|                         | OR,95%(CI)          | Heterogeneity                                            |
|-------------------------|---------------------|----------------------------------------------------------|
| <b>Age</b>              | -0.71 (-2.87, 1.45) | Chi <sup>2</sup> = 1.57, P = 0.95, I <sup>2</sup> = 0%   |
| <b>Sex</b>              |                     |                                                          |
| Overall results         | 1.01 (0.78, 1.30)   | Chi <sup>2</sup> = 25.60, P = 0.08; I <sup>2</sup> = 34% |
| male                    | 1.34 (0.94, 1.91)   | Chi <sup>2</sup> = 10.42, P = 0.24; I <sup>2</sup> = 23% |
| female                  | 0.78(0.54,1.11)     | Chi <sup>2</sup> = 10.73, P = 0.22; I <sup>2</sup> = 25% |
| <b>Tumor location</b>   |                     |                                                          |
| Overall results         | 0.92(0.70,1.20)     | Chi <sup>2</sup> = 10.88, P = 0.90, I <sup>2</sup> = 0%  |
| Oral cavity             | 0.85 [0.55, 1.30]   | Chi <sup>2</sup> = 1.87, P = 0.87, I <sup>2</sup> = 0%   |
| Oropharynx+ hypopharynx | 0.96 [0.64, 1.44]   | Chi <sup>2</sup> = 3.98, P = 0.55, I <sup>2</sup> = 0%   |
| Nasopharynx cavity      | 1.57(0.66,3.72)     | Chi <sup>2</sup> = 1.20, P = 0.55, I <sup>2</sup> = 0%   |
| Others                  | 0.49(0.17,1.44)     | Chi <sup>2</sup> = 1.17, P = 0.76, I <sup>2</sup> = 0%   |

Supplement table 2.

**Subgroup analysis for the of the mild mucositis between honey vs. control intervention**

| Outcome and subgroups       | participants | OR,95%(CI)      | Heterogeneti (I <sup>2</sup> and P) |         |
|-----------------------------|--------------|-----------------|-------------------------------------|---------|
| <b>County</b>               |              |                 |                                     |         |
| Overall results             | 79/97        | 0.71(0.49,1.05) | I <sup>2</sup> =78%                 | P<0.01  |
| Aisa                        | 47/66        | 0.60(0.38,0.95) | I <sup>2</sup> =82%                 | P<0.01  |
| Non-Asia                    | 32/31        | 1.12(0.54,2.33) | I <sup>2</sup> =2%                  | P=0.31  |
| <b>mucositis cause</b>      |              |                 |                                     |         |
| Overall results             | 79/97        | 0.71(0.49,1.05) | I <sup>2</sup> =78%                 | P<0.01  |
| Radiotherapy                | 38/38        | 1.00(0.57,1.74) | I <sup>2</sup> =87%                 | P<0.01  |
| Radiotherapy + chemotherapy | 41/59        | 0.52(0.31,0.90) | I <sup>2</sup> =74%                 | P=0.01  |
| <b>Radiation dose</b>       |              |                 |                                     |         |
| Overall results             | 79/97        | 0.71(0.49,1.05) | I <sup>2</sup> =78%                 | P<0.001 |
| <60Gy                       | 78/81        | 0.94(0.62,1.42) | I <sup>2</sup> =76%                 | P<0.001 |
| ≥60Gy                       | 1/16         | 0.04(0.00,0.29) | --                                  | --      |
| <b>Assessment scale</b>     |              |                 |                                     |         |
| Overall results             | 79/97        | 0.71(0.49,1.05) | I <sup>2</sup> =78%                 | P<0.01  |
| WHO                         | 11/23        | 0.29(0.11,0.73) | I <sup>2</sup> =68%                 | P=0.08  |
| RTOG                        | 68/74        | 0.87(0.57,1.34) | I <sup>2</sup> =87%                 | P<0.01  |
| <b>Control arm</b>          |              |                 |                                     |         |
| Overall results             | 79/97        | 0.71(0.49,1.05) | I <sup>2</sup> =78%                 | P<0.001 |
| placebo                     | 26/23        | 1.45(0.59,3.56) | --                                  | --      |
| saline                      | 25/58        | 0.28(0.15,0.49) | I <sup>2</sup> =67%                 | P=0.003 |
| other                       | 28/16        | 2.43(1.13,5.23) | I <sup>2</sup> =84%                 | P=0.002 |

Supplement table 3.

**Subgroup analysis for the of the severe mucositis between honey vs. control intervention**

| Outcome and subgroups       | participants | OR,95%(CI)      | Heterogeneti (I <sup>2</sup> and P) |        |
|-----------------------------|--------------|-----------------|-------------------------------------|--------|
| <b>County</b>               |              |                 |                                     |        |
| Overall results             | 79/145       | 0.30(0.20,0.44) | I <sup>2</sup> =78%                 | P<0.01 |
| Asia                        | 14/80        | 0.10(0.05,0.19) | I <sup>2</sup> =56%                 | P=0.04 |
| Non-Asia                    | 65/65        | 0.98(0.54,1.80) | I <sup>2</sup> =12%                 | P=0.29 |
| <b>mucositis cause</b>      |              |                 |                                     |        |
| Overall results             | 79/145       | 0.30(0.20,0.44) | I <sup>2</sup> =73%                 | P<0.01 |
| Radiotherapy                | 56/89        | 0.32(0.18,0.54) | I <sup>2</sup> =84%                 | P<0.01 |
| Radiotherapy + chemotherapy | 23/56        | 0.28(0.15,0.50) | I <sup>2</sup> =73%                 | P=0.01 |
| <b>Radiation dose</b>       |              |                 |                                     |        |
| Overall results             | 79/145       | 0.30(0.20,0.44) | I <sup>2</sup> =78%                 | P<0.01 |
| <60Gy                       | 52/66        | 0.47(0.25,0.90) | I <sup>2</sup> =93%                 | P<0.01 |
| ≥60Gy                       | 27.79        | 0.22(0.13,0.37) | I <sup>2</sup> =67%                 | P<0.01 |
| <b>Assessment scale</b>     |              |                 |                                     |        |
| Overall results             | 79/145       | 0.30(0.20,0.44) | I <sup>2</sup> =78%                 | P<0.01 |
| WHO                         | 2/22         | 0.04(0.01,0.19) | I <sup>2</sup> =0%                  | P=0.92 |
| RTOG                        | 77/123       | 0.37(0.24,0.56) | I <sup>2</sup> =77%                 | P<0.01 |
| <b>Control arm</b>          |              |                 |                                     |        |
| Overall results             | 79/145       | 0.30(0.20,0.44) | I <sup>2</sup> =78%                 | P<0.01 |
| placebo                     | 65/65        | 0.98(0.54,1.80) | I <sup>2</sup> =12%                 | P=0.29 |
| saline                      | 13/53        | 0.14(0.07,0.28) | I <sup>2</sup> =68%                 | P=0.02 |
| other                       | 1/27         | 0.03(0.01,0.17) | I <sup>2</sup> =0%                  | P=0.75 |
