# Supplementary figures and images for: Role of honey in preventing radiation-induced oral mucositis: a meta-analysis of randomized controlled trials
Source: Royal Society of Chemistry journal article supplement (doi:10.1039/d0fo02808h), 2021-01-01

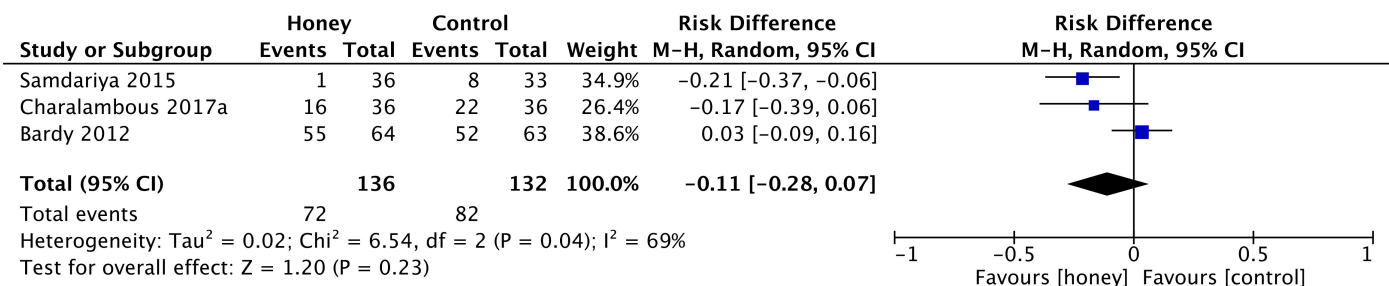

Supplement: d0fo02808h4.pdf [file d0fo02808h4.pdf]

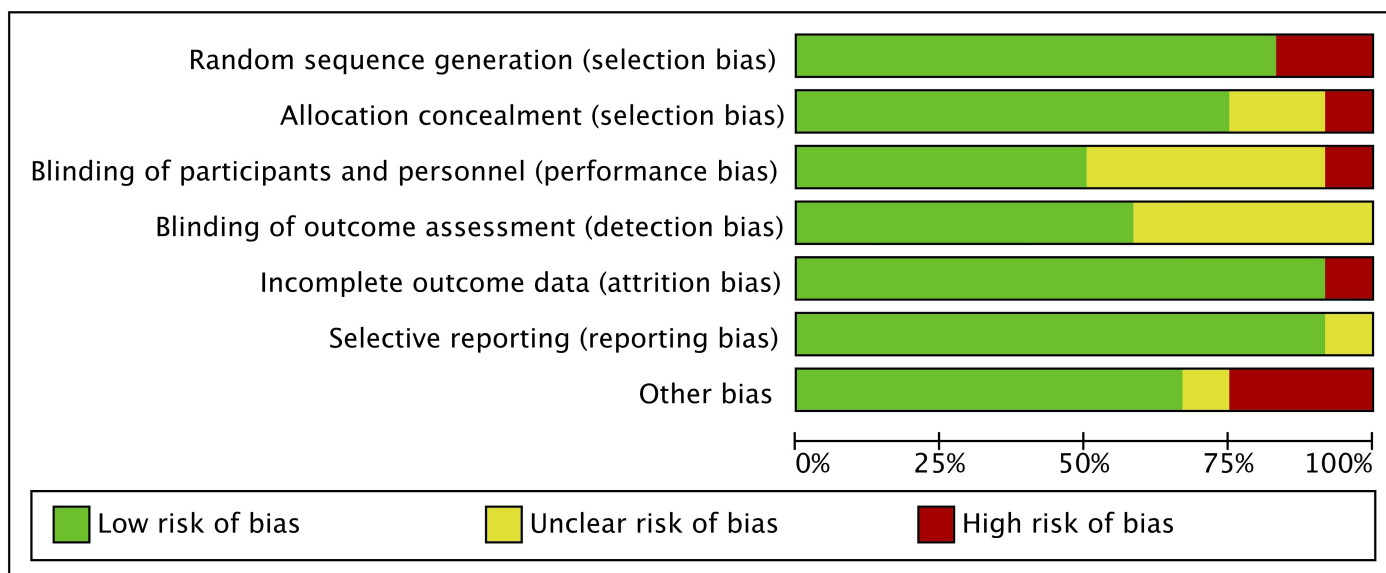

Supplement: d0fo02808h5.pdf [file d0fo02808h5.pdf]
